# Supplementary material for: Development of molecular precursors for deposition of indium sulphide thin film electrodes for photoelectrochemical applications
Source: Royal Society of Chemistry journal article supplement (doi:10.1039/c3dt50781e), 2013-01-01
Supplement: c3dt50781e.pdf [file c3dt50781e.pdf]

## Supporting Information

# Development of molecular precursors for deposition of indium sulphide thin film electrodes for photoelectrochemical applications

### CHN Analysis

Precursor  $[\text{In}(\text{S}_2\text{CNCy}_2)_3] \cdot 2\text{Py}$  (1)

| Run Details |       |                   |        | Results |          |          | Simplest Empirical Formula |          |          |
|-------------|-------|-------------------|--------|---------|----------|----------|----------------------------|----------|----------|
| Run         | Run # | Created On        | Weight | Carbon  | Hydrogen | Nitrogen | Carbon                     | Hydrogen | Nitrogen |
| DD4         | 90    | 2012-8-27 4:39 PM | 1.495  | 56.73   | 7.831    | 6.329    | 10.453                     | 17.194   | 1        |

Precursor  $[\text{In}(\text{S}_2\text{CN}(\text{iPr})_2)_3] \cdot 1.5\text{Py}$  (2)

| Run Details |       |                     |        | Results |          |          | Simplest Empirical Formula |          |          |
|-------------|-------|---------------------|--------|---------|----------|----------|----------------------------|----------|----------|
| Run         | Run # | Created On          | Weight | Carbon  | Hydrogen | Nitrogen | Carbon                     | Hydrogen | Nitrogen |
| AA2         | 8     | 2012-10-16 11:40 AM | 1.57   | 43.722  | 6.688    | 7.941    | 6.421                      | 11.703   | 1        |

Precursor  $[\text{In}(\text{S}_2\text{CPip})_3] \cdot 0.5\text{Py}$  (3)

| Run Details |       |                    |        | Results |          |          | Simplest Empirical Formula |          |          |
|-------------|-------|--------------------|--------|---------|----------|----------|----------------------------|----------|----------|
| Run         | Run # | Created On         | Weight | Carbon  | Hydrogen | Nitrogen | Carbon                     | Hydrogen | Nitrogen |
| E10         | 74    | 2012-10-3 11:24 AM | 1.585  | 37.708  | 5.057    | 7.407    | 5.937                      | 9.487    | 1        |

Precursor  $[\text{In}(\text{S}_2\text{CNBzMe})_3]$  (4)

| Run Details |       |                    |        | Results |          |          | Simplest Empirical Formula |          |          |
|-------------|-------|--------------------|--------|---------|----------|----------|----------------------------|----------|----------|
| Run         | Run # | Created On         | Weight | Carbon  | Hydrogen | Nitrogen | Carbon                     | Hydrogen | Nitrogen |
| DB2         | 87    | 2012-7-10 12:29 PM | 2.071  | 45.696  | 4.334    | 6.057    | 8.893                      | 9.983    | 1        |

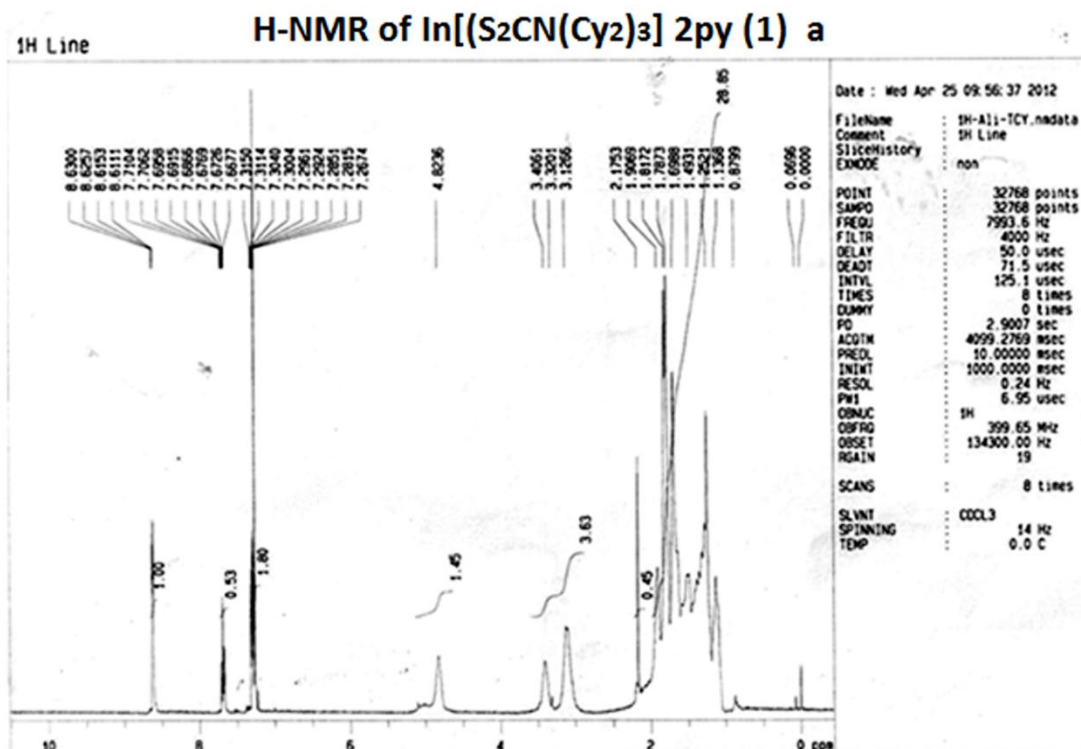

S.Fig. 1a: H-NMR of Precursor  $[\text{In}(\text{S}_2\text{CNCy}_2)_3] \cdot 2\text{Py}(\mathbf{1})$

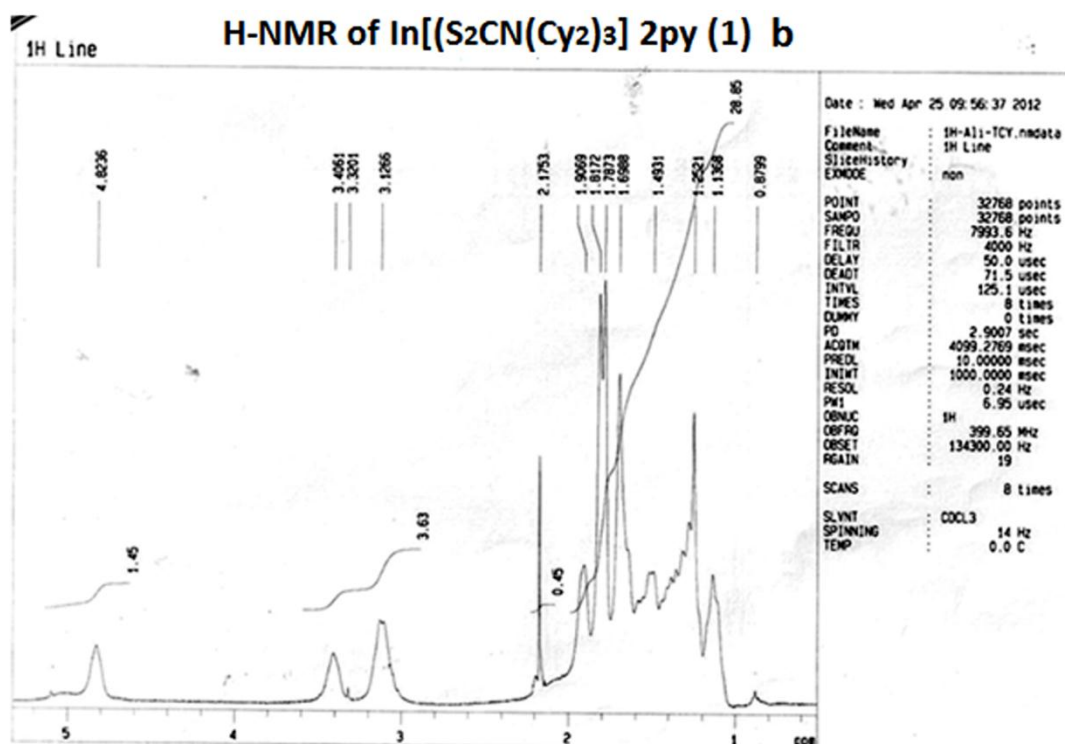

S.Fig. 1b: H-NMR of Precursor  $[\text{In}(\text{S}_2\text{CNCy}_2)_3] \cdot 2\text{Py}(\mathbf{1})$

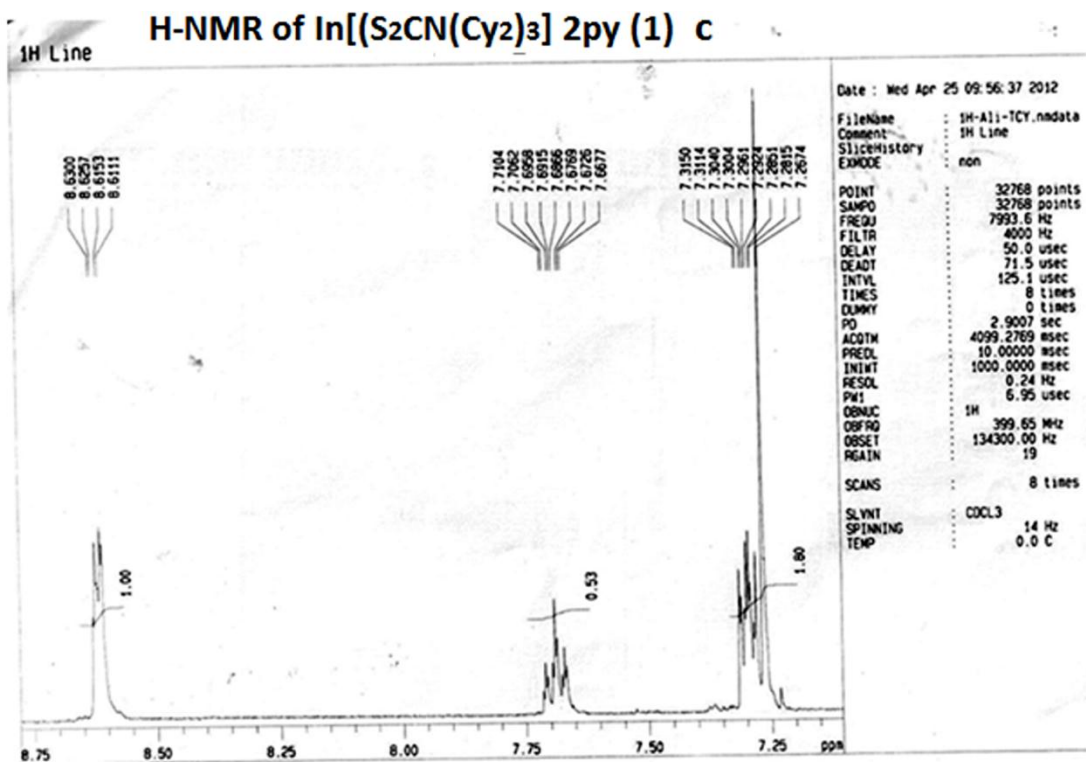

**S.Fig. 1c:** H-NMR of Precursor  $[\text{In}(\text{S}_2\text{CNCy}_2)_3] \cdot 2\text{Py}(1)$

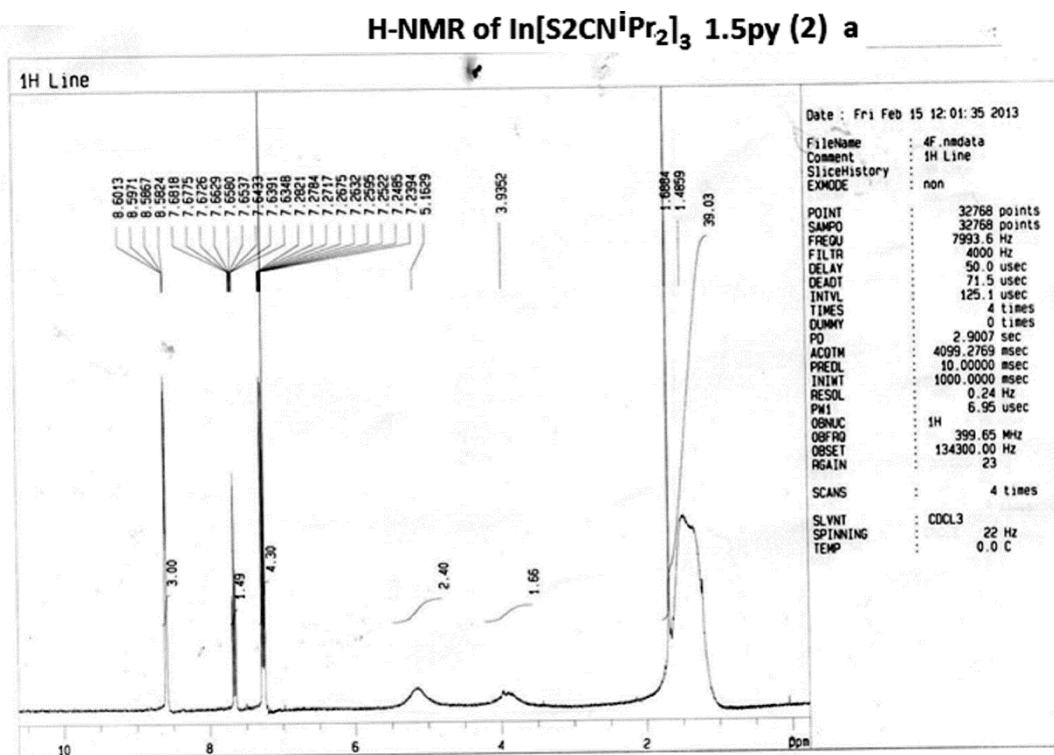

**S.Fig. 2a:** H-NMR of Precursor  $[\text{In}(\text{S}_2\text{CN}^i\text{Pr}_2)_3] \cdot 1.5\text{py} (2)$

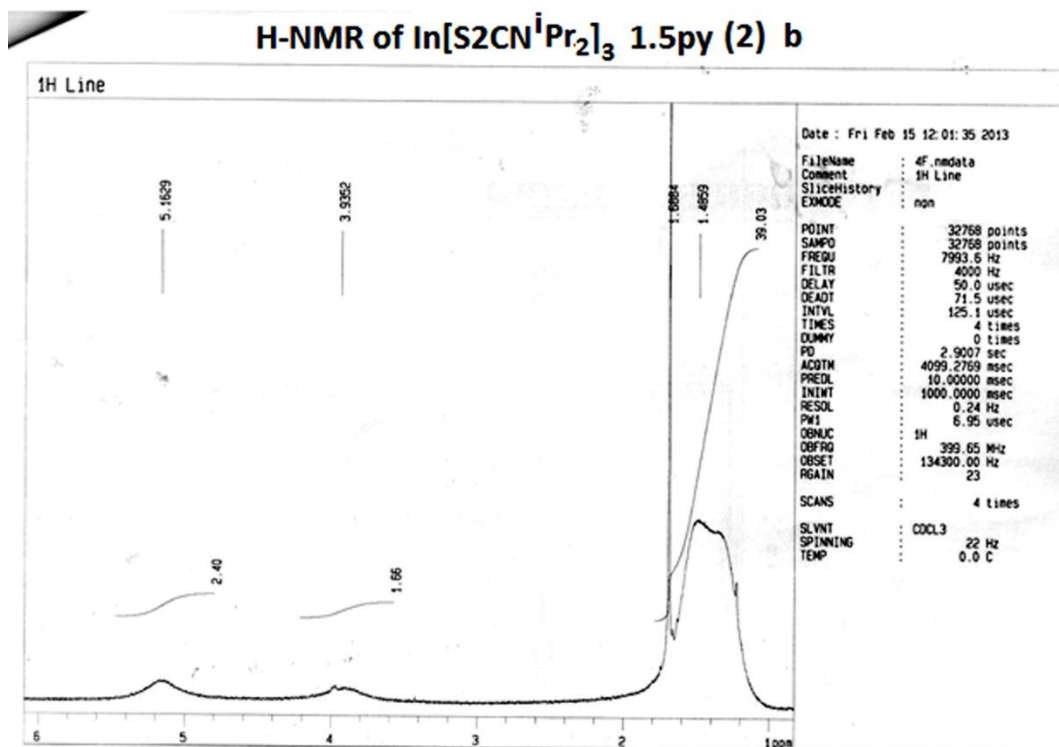

**S.Fig. 2b:** H-NMR of Precursor  $[\text{In}(\text{S}_2\text{CN}^i\text{Pr})_2]_3 \cdot 1.5\text{py}$  (2)

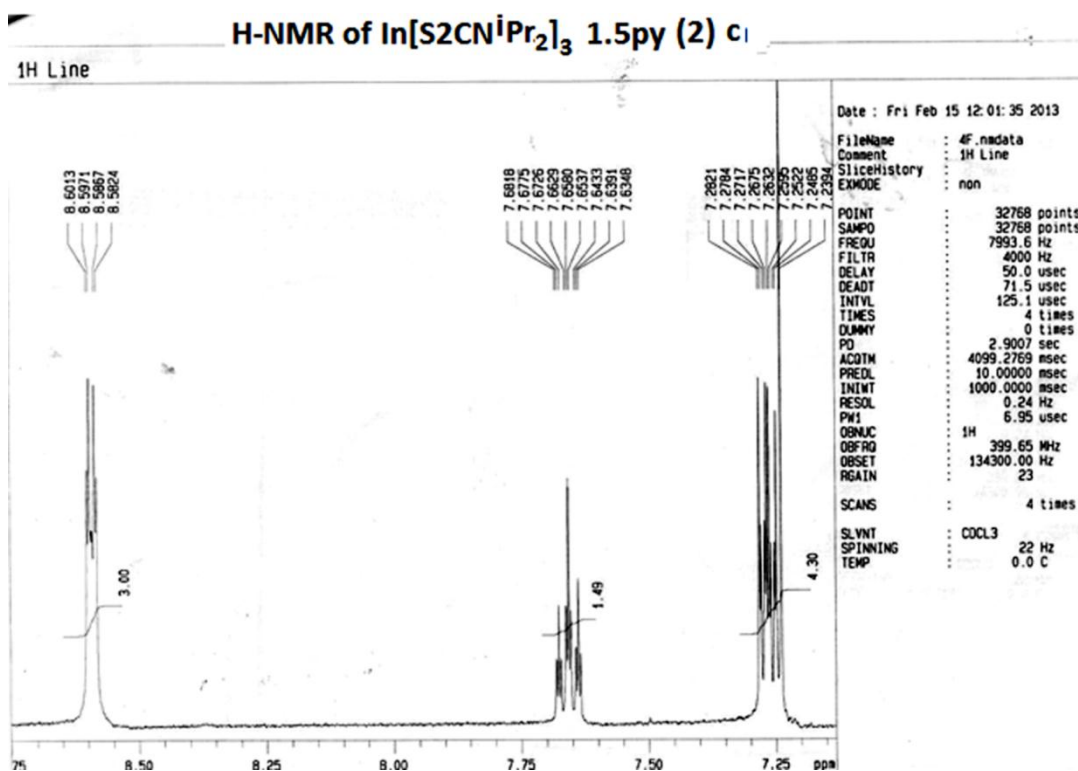

**S.Fig. 2c:** H-NMR of Precursor  $[\text{In}(\text{S}_2\text{CN}^i\text{Pr})_2]_3 \cdot 1.5\text{py}$  (2)



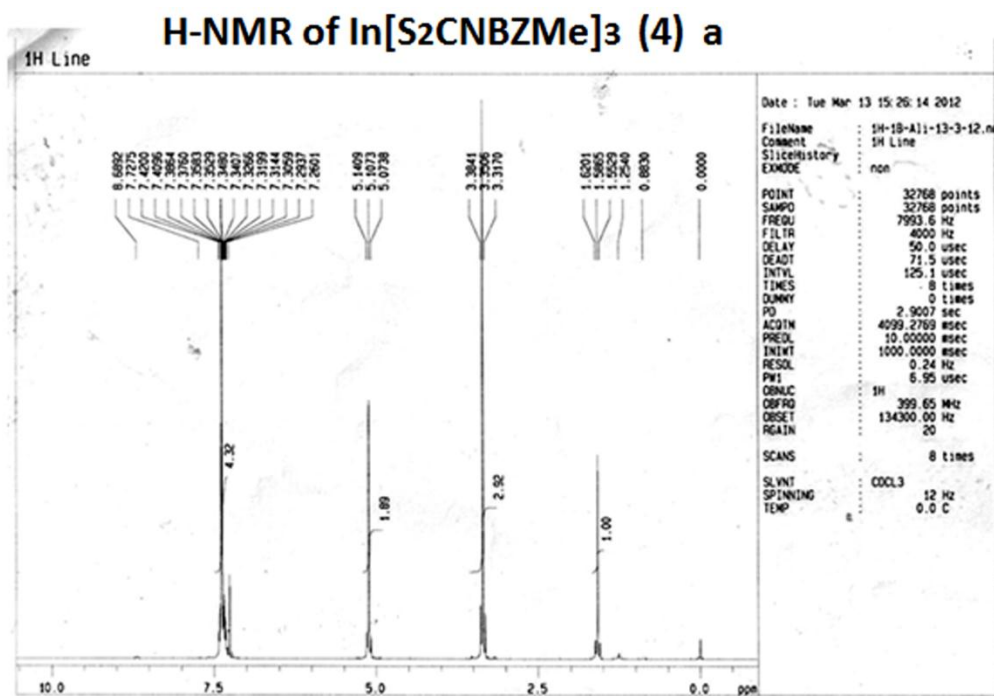

S.Fig. 4a: H-NMR of Precursor [In(S<sub>2</sub>CNBzMe)<sub>3</sub>] (4)

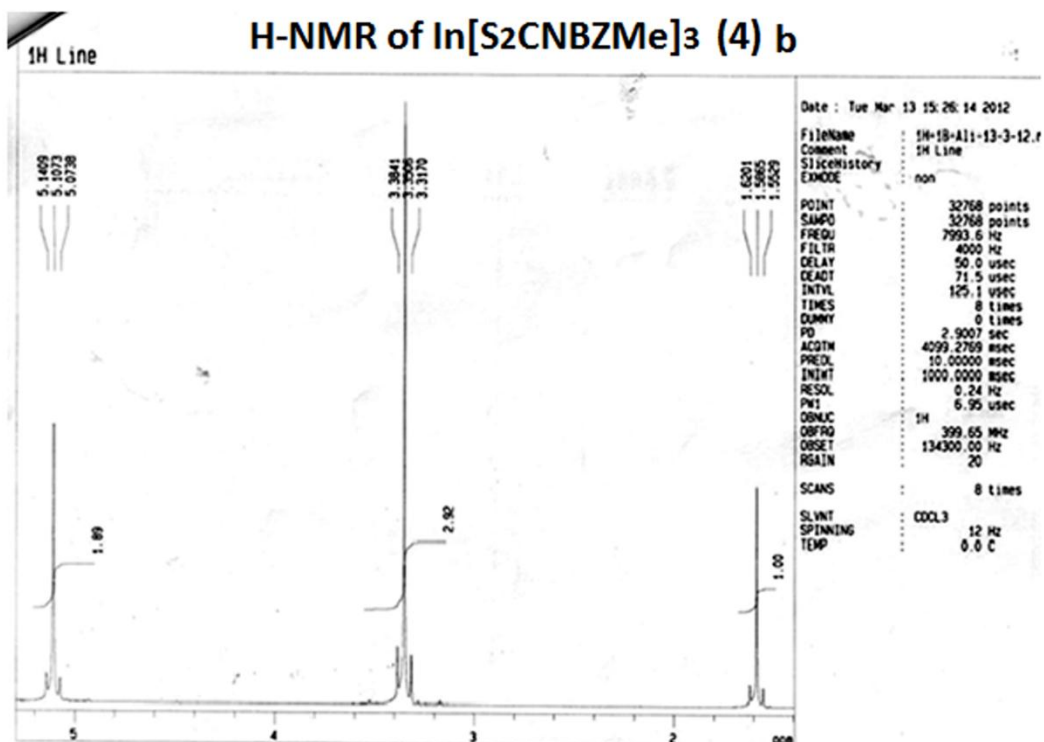

S.Fig. 4b: H-NMR of Precursor [In(S<sub>2</sub>CNBzMe)<sub>3</sub>] (4)

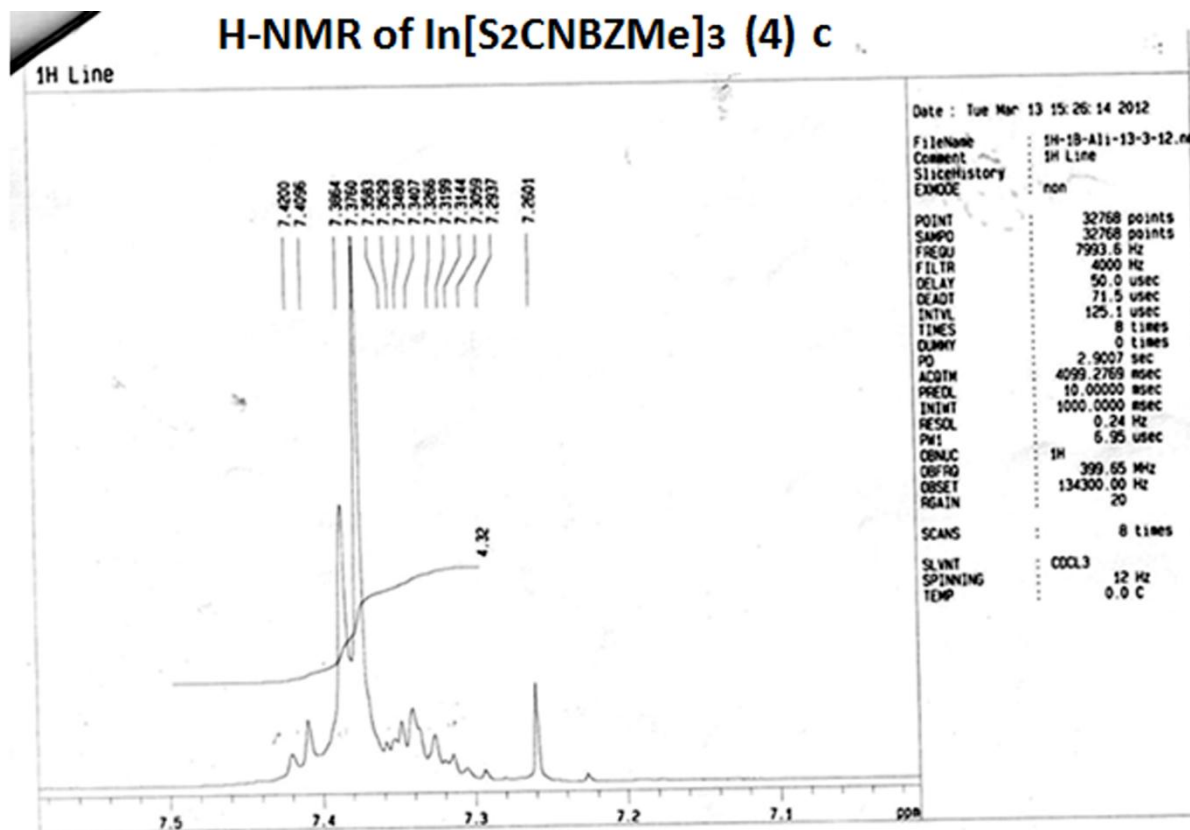

**S. Fig. 4c:** H-NMR of Precursor  $[\text{In}(\text{S}_2\text{CNBzMe})_3]$  (4)

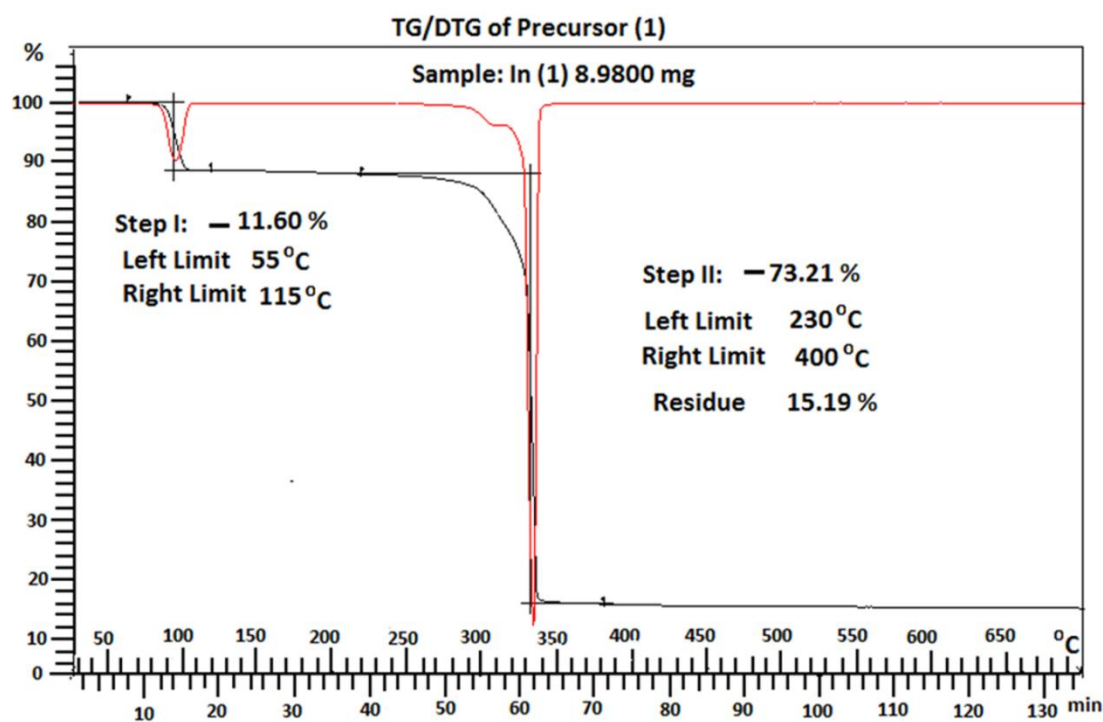

**S. Fig. 5a:** TG/DTG curves presenting losses in weight against temperature for precursor  $[\text{In}(\text{S}_2\text{CNCy}_2)_3] \cdot 2\text{py}$  (1)

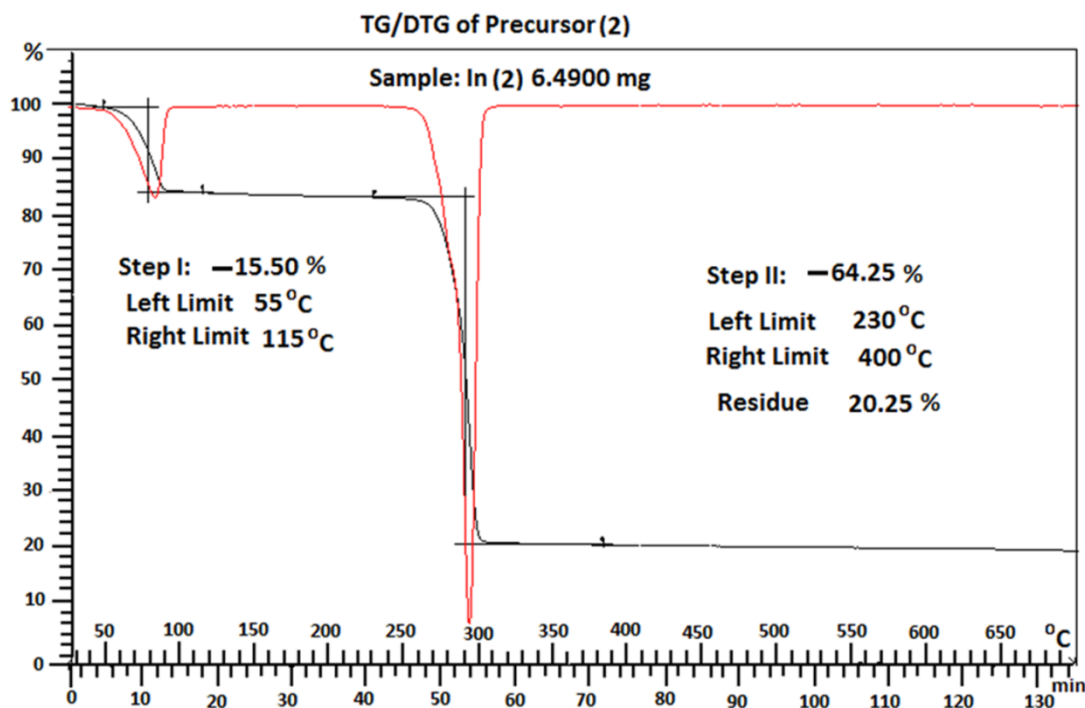

**S. Fig. 5b:** TG/DTG curves presenting losses in weight against temperature for precursor  $[\text{In}(\text{S}_2\text{CN}(\text{Pr})_2)_3] \cdot 1.5\text{py}$  (2)

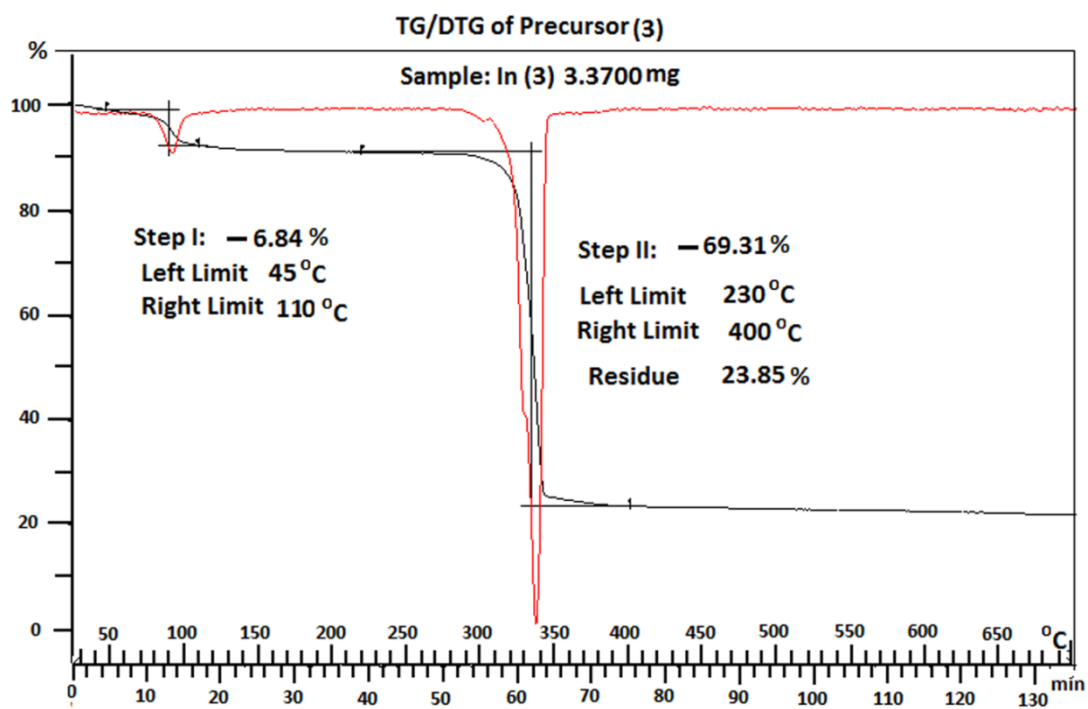

**S. Fig. 5c:** TG/DTG curves presenting losses in weight against temperature for precursor  $[\text{In}(\text{S}_2\text{CPip})_3] \cdot 0.5\text{Py}$  (3)



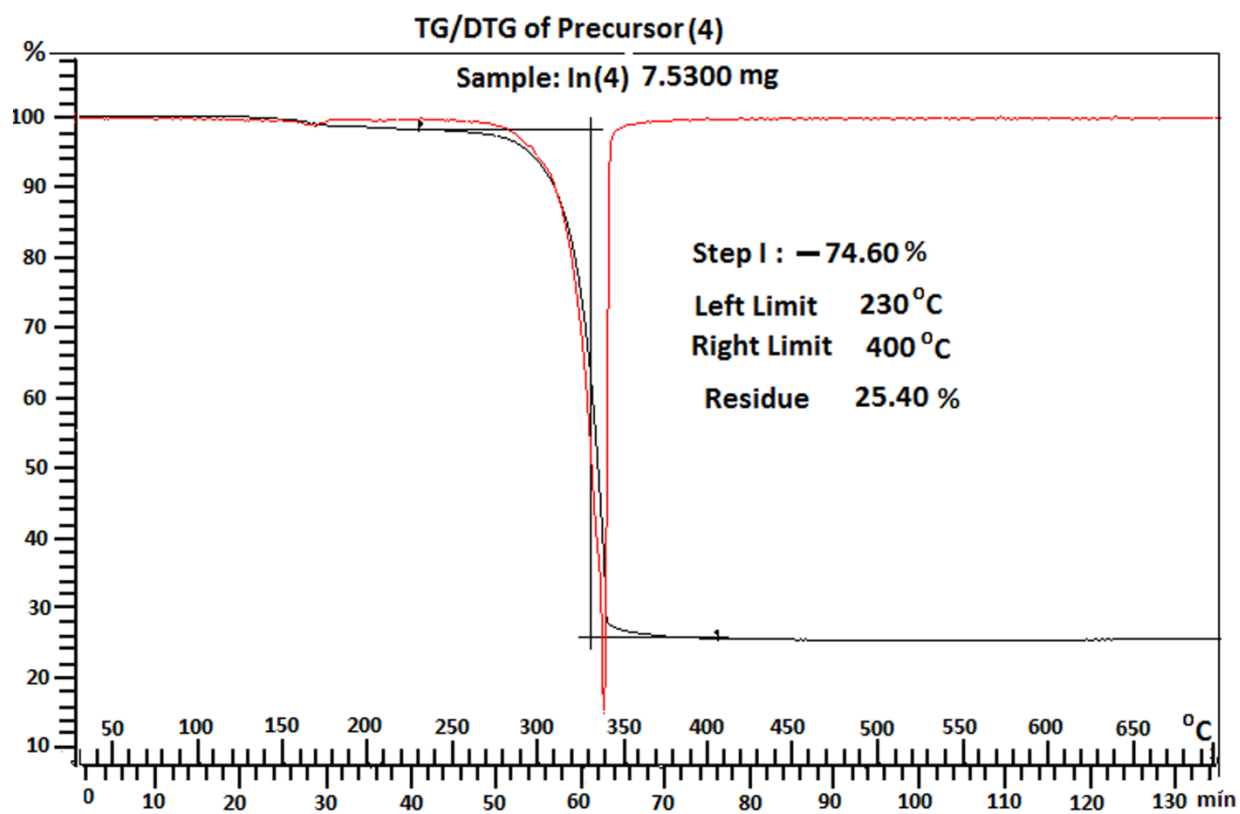

**S. Fig. 5d:** TG/DTG curves presenting losses in weight against temperature for precursor  $[\text{In}(\text{S}_2\text{CNBzMe})_3]$  (4)

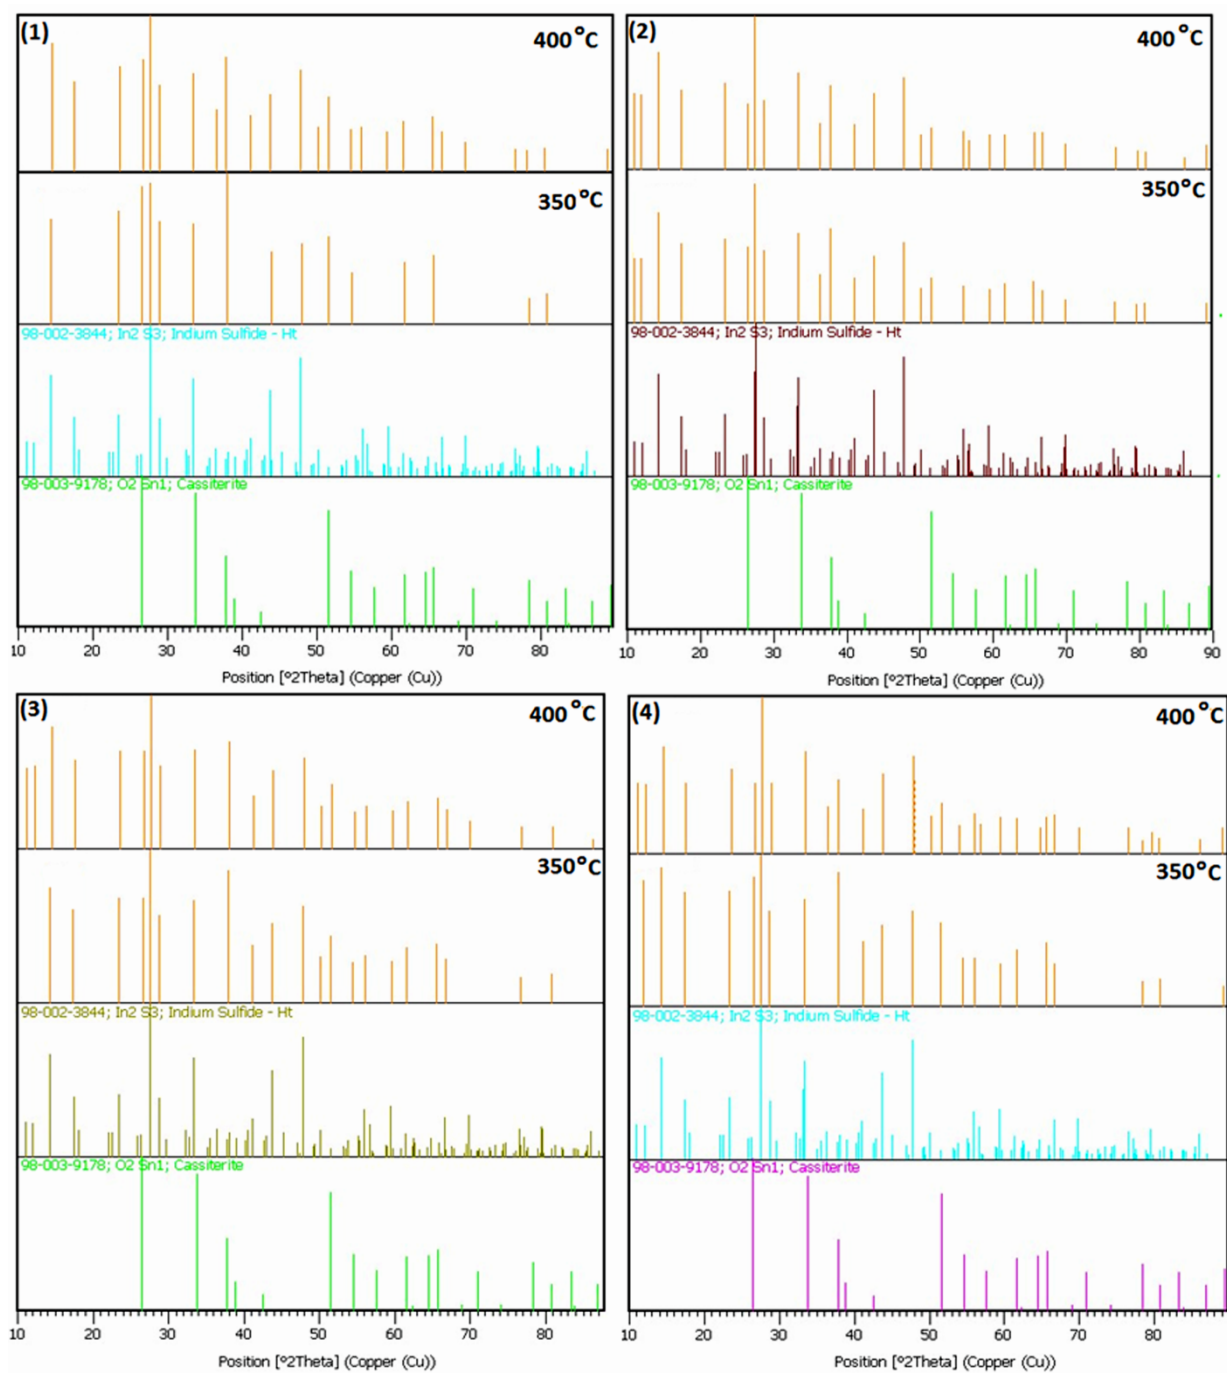

**S. Fig. 6:** Comparisons of PXRD patterns of  $\beta$ - $\text{In}_2\text{S}_3$  thin films deposited from precursor  $[\text{In}(\text{S}_2\text{CNCy}_2)_3] \cdot 2\text{py}$  (1),  $[\text{In}(\text{S}_2\text{CN}(\text{iPr})_2)_3] \cdot 1.5\text{py}$  (2),  $[\text{In}(\text{S}_2\text{CPip})_3] \cdot 0.5\text{py}$  (3) and  $[\text{In}(\text{S}_2\text{CNBzMe})_3]$  (4) at 350 and 400°C with the standard ICSD= [98-002-3844] file.

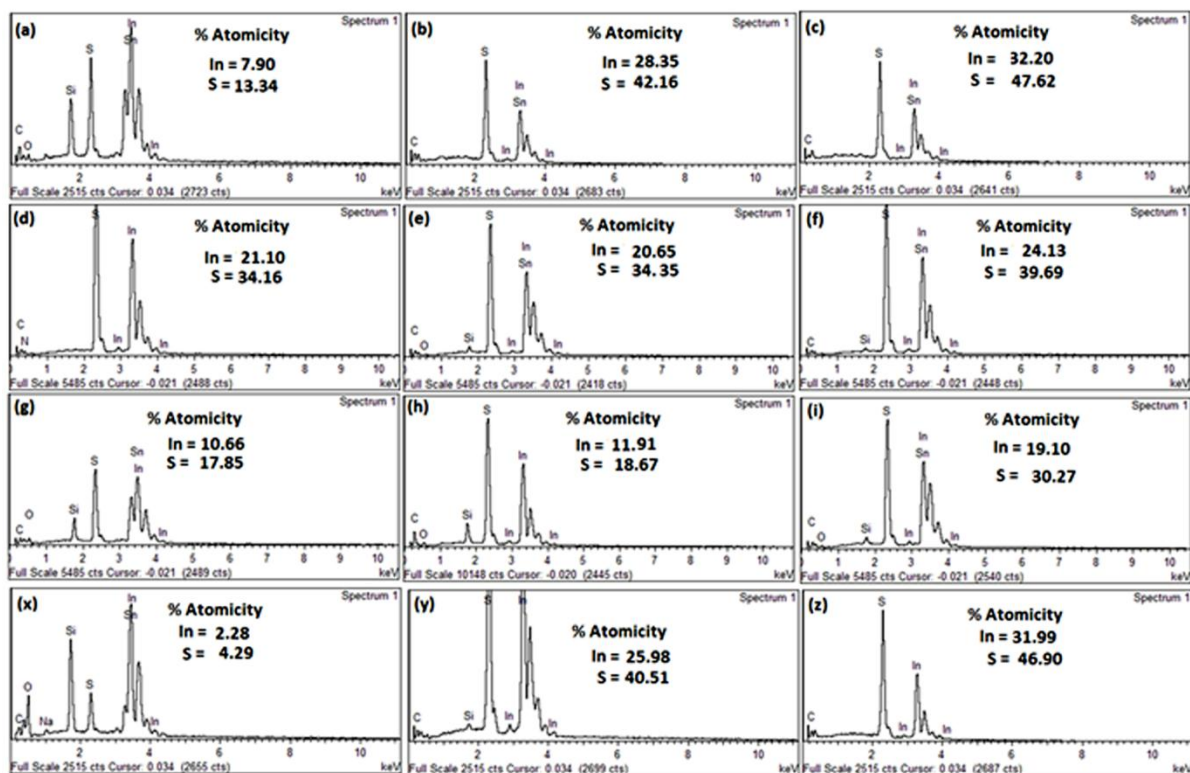

**S. Fig. 7** : EDX spectra of  $\beta$ -In<sub>2</sub>S<sub>3</sub> thin films deposited using precursors [In(S<sub>2</sub>CNCy<sub>2</sub>)<sub>3</sub>]•2py (**1**) at **(a)** 300 °C **(b)** 350 °C **(c)** 400 °C [In(S<sub>2</sub>CN(Pr)<sub>2</sub>)<sub>3</sub>]•1.5py (**2**) at **(d)** 300 °C **(e)** 350 °C and **(f)** 400 °C; [In(S<sub>2</sub>CPip)<sub>3</sub>]•0.5py (**3**) at **(g)** 300 °C **(h)** 350 °C **(i)** 400 °C and [In(S<sub>2</sub>CNBzMe)<sub>3</sub>] (**4**) at **(x)** 300 °C **(y)** 350 °C and **(z)** 400 °C.
